# Supplementary material
Source: MDPI journal article supplement (https://www.mdpi.com/2073-4395/13/9/2428)
Supplement: s1 [file s1]

**Supplementary Material for: Layered strip fertilization improves nitrogen use efficiency by enhancing absorption and suppressing loss of urea nitrogen**

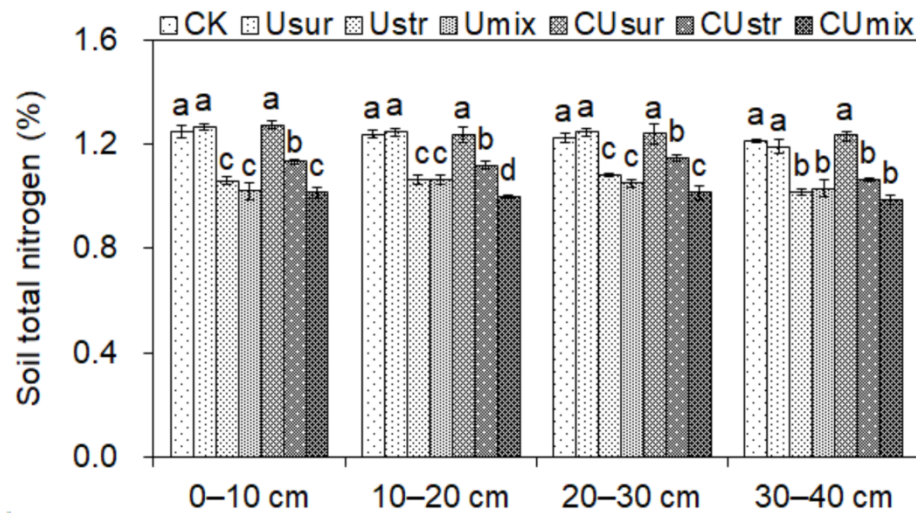

**Figure S1.** The concentration and distribution of total nitrogen in soil layer (0–40 cm) under different fertilization treatments. Data are expressed as the mean of four replicates ( $n = 4$ ). The vertical lines represent the standard error, and the different lowercase letters indicate significant differences among different treatments ( $P < 0.05$ ). CK, blank soil; U<sub>sur</sub>, surface application of urea; U<sub>str</sub>, layered-strip application of urea; U<sub>mix</sub>, layered-mix application of urea; CU<sub>sur</sub>, surface application of coated urea; CU<sub>str</sub>, layered-strip application of coated urea; CU<sub>mix</sub>, layered-mix application of coated urea.
